# Supplementary material for: A new mutation-independent approach to cancer therapy: Inhibiting oncogenic RAS and MYC, by targeting mitochondrial biogenesis
Source: publisher site journal article supplement (doi:10.18632/aging.101304), 2017-10-27
Supplement: Supplementary file [file aging-v9i10-101304-supplementary-material-SD1.pdf]

## c-Myc Mito-Signature

### All Breast Cancer Subtypes Combined

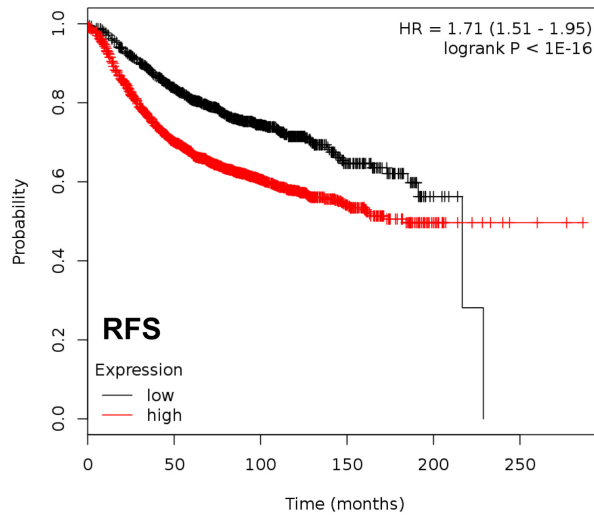

**Supplementary Figure S1. A short c-Myc-related mitochondrial signature predicts poor clinical outcome, in all breast cancer sub-types, when combined.** Note that this short 3-gene signature (HSPD1/COX5B/TIMM44) also effectively predicts tumor recurrence in a larger population of breast cancer patients (N=3,951). RFS, recurrence-free survival.
